# Supplementary material
Source: Research Square preprint supplement (doi:10.21203/rs.3.rs-8970591/v1)
Supplement: Supplementary file 1 [file 3d6112fd7dfbf01023ef8f70.docx]

**Suplementary Information**

**SP-1 Data section**

**Table S1.** Electric field strengths (a.u.), ground‑state energies (Hartree), and first excited‑state energies (Hartree) of ethylene.

| Electric Field | Ground State Energy | First Excited State Energy | Electric Field | Ground State Energy | First Excited State Energy |
| --- | --- | --- | --- | --- | --- |
| 0.039 | -78.534150 | -78.336355 | 0.000 | -78.525463 | -78.265562 |
| 0.037 | -78.534217 | -78.330707 | -0.010 | -78.528649 | -78.266045 |
| 0.036 | -78.534316 | -78.325174 | -0.012 | -78.529102 | -78.267439 |
| 0.034 | -78.534235 | -78.318201 | -0.013 | -78.529587 | -78.269358 |
| 0.032 | -78.534035 | -78.313466 | -0.015 | -78.530082 | -78.271733 |
| 0.031 | -78.533877 | -78.310023 | -0.016 | -78.530568 | -78.274495 |
| 0.029 | -78.533605 | -78.305352 | -0.018 | -78.531034 | -78.277583 |
| 0.028 | -78.533381 | -78.300854 | -0.020 | -78.531478 | -78.280947 |
| 0.026 | -78.533038 | -78.296522 | -0.021 | -78.531899 | -78.284546 |
| 0.024 | -78.5326996 | -78.292356 | -0.023 | -78.532297 | -78.288353 |
| 0.023 | -78.532325 | -78.288364 | -0.024 | -78.532671 | -78.292345 |
| 0.021 | -78.531923 | -78.284558 | -0.026 | -78.533010 | -78.296510 |
| 0.020 | -78.531497 | -78.280958 | -0.028 | -78.533296 | -78.300843 |
| 0.018 | -78.531050 | -78.277595 | -0.029 | -78.533517 | -78.305341 |
| 0.016 | -78.530578 | -78.274507 | -0.031 | -78.533639 | -78.310012 |
| 0.015 | -78.530089 | -78.271744 | -0.032 | -78.533752 | -78.314864 |
| 0.013 | -78.529591 | -78.269369 | -0.034 | -78.534139 | -78.319896 |
| 0.012 | -78.529104 | -78.267450 | -0.036 | -78.534254 | -78.325153 |
| 0.011 | -78.528650 | -78.266055 | -0.037 | -78.534219 | -78.330695 |
| 0.010 | -78.528650 | -78.266055 | -0.039 | -78.534071 | -78.335059 |

**SP-2 Computational methodology**

All of computations and simulations were carried out in a computational server armed by Intel’s core i9(R) 14900k processor and 64 GB of ram that installed LAMALINUX-10 [1] on it.

**SP-2-1 DFT computaions**

*SP-2-1-1 DFT computations.*

The DFT and TD-DFT computations were done using G16 computational quantum chemistry suits of programs [2]. It was used MO62X [3] functional for treating on the exchange and correlation effects and 6G311 with diffusion and polarization terms for non-hydrogen atoms was used. The values of 1×10-7 and 1×10-6 were considered as convergency criteria in electronic density and force on each atom.

Initial structures and input files were produced by the help of Chemaxon’s Marvinchem program [4] and Gabedit graphical interface for quantum chemistry programs [5] respectively. The analysis of the output files and graphical display of the molecular orbitals were also done by the help of Gabedit program.

The vibrational frequencies were used for stability analysis as the Hessian matrix.

All diagrams presented inside the article have been prepared by python programming with the help of matplotlib python library [6].

*SP-2-1-2 quantum thermodynamics analysis*

The python3 programming language [7] was served for the simulation of considered Molecular Otto engine. The results have been inserted in the article were obtained using the numeric python (numpy) [8], scientific python (scipy) [9], qutip and matplotlib libraries of the python3.

The master equation in a Markovian regime was solved with the help of master equation solver of qutip library (me function of qutip) [10]. The complete form of used files and all of codes will be uploaded as a github page named MQOHE as an automated software package not only for ethylene, but also for a desired organic or inorganic molecule as it is finished the preparing the required codes.

References

[1] Almalinnux-forever free enterprise grade operating system: [www.almalinux.com](http://www.almalinux.com/)

[2] Frisch, M.J., Trucks, G.W., Schlegel, H.B. et al. (2010). Gaussian development version, revision

h.32. Wallingford CT: Gaussian, Inc.

[3] Zhao, Y. & Truhlar, D. G. The M06 suite of density functionals for main group thermochemistry, thermochemical kinetics, noncovalent interactions, excited states, and transition elements. Theoretical Chemistry Accounts **120**, 215–241 (2008).

[4] https://chemaxon.com/marvin

[5] Allouche A. R., *J. Comp. Chem.* (2011) **32:** 174-182

[6] Hunter, J. D. Matplotlib: A 2D graphics environment. Computing in Science & Engineering **9**, 90–95 (2007).

[7] Van Rossum, G. & Drake, F. L. Python 3 Reference Manual. CreateSpace, Scotts Valley, CA (2009).

[8] Harris, C. R. et al. Array programming with NumPy. Nature **585**, 357–362 (2020).

[9] Virtanen, P. et al. SciPy 1.0: Fundamental algorithms for scientific computing in Python. Nature Methods **17**, 261–272 (2020).

[10] Johansson, J. R., Nation, P. D. & Nori, F. QuTiP: An open-source Python framework for the dynamics of open quantum systems. Computer Physics Communications **183**, 1760–1772 (2012).
